# Supplementary material for: Variation in Mutation Spectra Among CRISPR/Cas9 Mutagenized Poplars
Source: PubMed Central journal article supplement (PMC5949366; doi:10.3389/fpls.2018.00594), 2018-05-07
Supplement: Image_1.pdf [file Image_1.pdf]

Amino acid modifications in *PLFY* for *LFY*-sg1

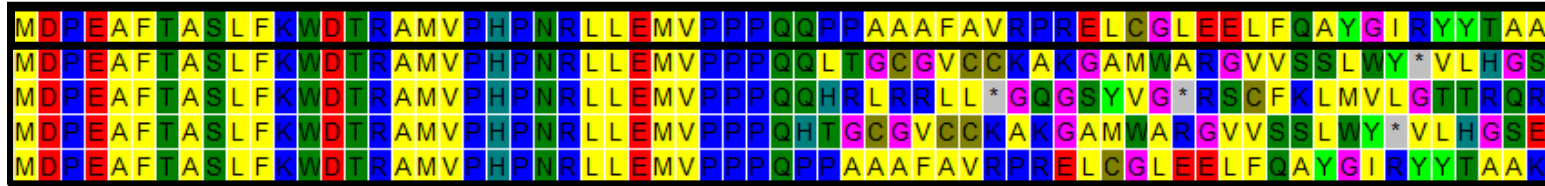

| Genotype |
|----------|
| WT       |
| +1 bp    |
| -1 bp    |
| -2 bp    |
| -3 bp    |

Amino acid modifications in *PLFY* for *LFY*-sg1sg2

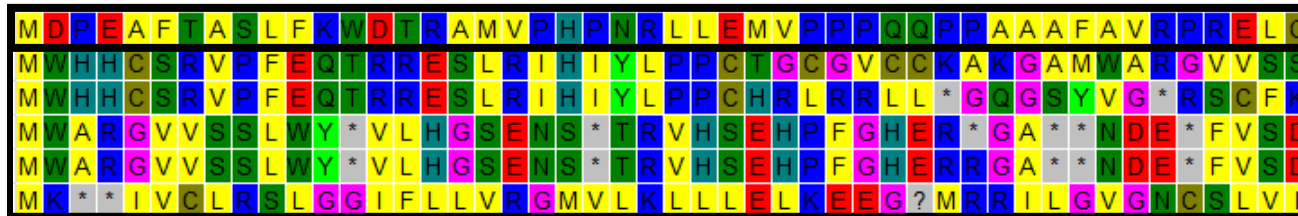

| Genotype         |
|------------------|
| WT               |
| 120 bp inversion |
| 121 bp inversion |
| -120 bp          |
| -121 bp          |
| -130 bp          |

Amino acid modifications in *PAG1* for *AG*-sg1sg2

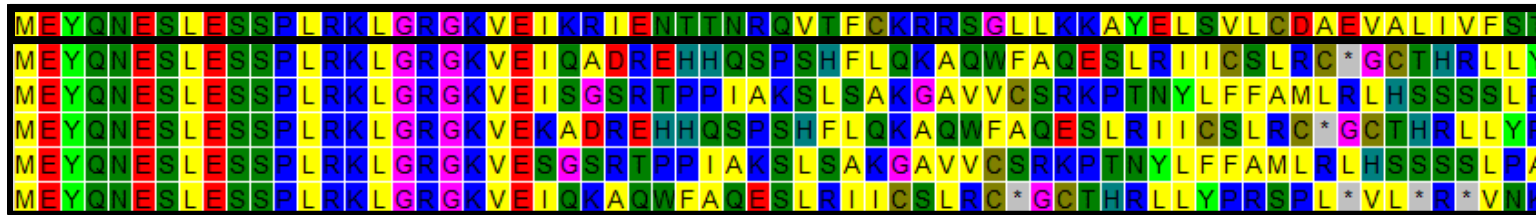

| Genotype |
|----------|
| WT       |
| +1 bp    |
| -1 bp    |
| -2 bp    |
| -4 bp    |
| -41 bp   |

Amino acid modifications in *PAG2* for *AG*-sg1sg2

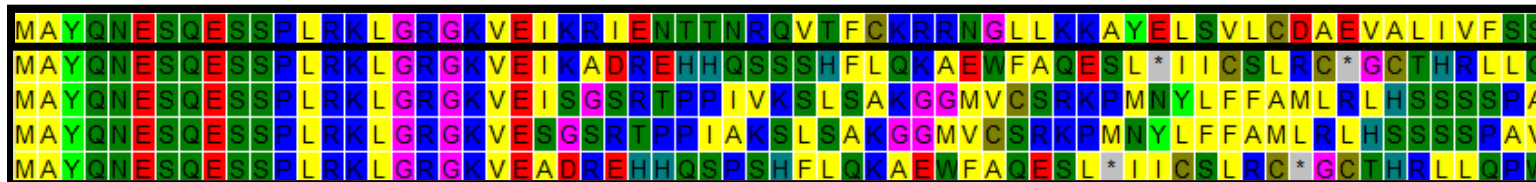

| Genotype |
|----------|
| WT       |
| +1 bp    |
| -1 bp    |
| -4 bp    |
| -5 bp    |

Fig S1. Diversity in putative amino acid modifications to the WT peptide sequence in 717. These peptide alignments are the partial translation of the sequence alignment from the most common mutations seen in events with *LFY*-sg1, *LFY*-sg1sg2, and *AG*-sg1sg2. The first line in each alignment shows the WT sequence. Stop codons are shown with a \*. The tables to the right identify the specific mutation that led to the peptide modification in each row.
